# Supplementary material for: Operatively Managed Transverse or Short Oblique B1 Periprosthetic Fractures Around a Polished Taper-Slip Femoral Stem Are Associated With Reoperation in One Third of Cases: A Retrospective Cohort Study
Source: PubMed Central journal article supplement — Arthroplast Today. 2024 Nov 13;30:101551. doi: 10.1016/j.artd.2024.101551 (PMC11605324; doi:10.1016/j.artd.2024.101551), 2024-11-13
Supplement: mmc2.pdf [file mmc2.pdf]

# INDIVIDUAL CONFLICT OF INTEREST STATEMENT

## *American Association of Hip and Knee Surgeons*

(Adopted from the American Academy of Orthopaedic Surgeons disclosure statement)

The following form **must be filled out completely and submitted by each author (example, 6 authors, 6 forms).**  
**All items require a response. If there is no relevant disclosure for a given item, enter "None."**

---

**Manuscript Title- Operatively managed transverse or short oblique B1 periprosthetic fractures are associated with reoperation in one third of cases: a retrospective cohort study**

1. Royalties from a company or supplier (The following conflicts were disclosed)

None

2. Speakers bureau/paid presentations for a company or supplier (The following conflicts were disclosed)

None

3A. Paid employee for a company or supplier (The following conflicts were disclosed)

None

3B. Paid consultant for a company or supplier (The following conflicts were disclosed)

None

3C. Unpaid consultants for a company or supplier (The following conflicts were disclosed)

None

4. Stock or stock options in a company or supplier (The following conflicts were disclosed)

None

5. Research support from a company or supplier as a Principal Investigator (The following conflicts were disclosed)

None

6. Other financial or material support from a company or supplier (The following conflicts were disclosed)

None

7. Royalties, financial or material support from publishers (The following conflicts were disclosed)

None

8. Medical/Orthopaedic publications editorial/governing board (The following conflicts were disclosed)

None

9. Board member/committee appointments for a society (The following conflicts were disclosed)

None

**Each author must sign AND print or type his/her name, date and submit a separate form**

In addition, one BLINDED Conflict of Interest form (no author names used) should be submitted per manuscript with all author disclosures.

Abigail LW Bowley



01/02/2024

---

Author Name (Print or Type)

Author Signature

Date
